# Supplementary material for: Zinc-selective inhibition of the promiscuous bacterial amide-hydrolase DapE: implications of metal heterogeneity for evolution and antibioticdrug design
Source: Royal Society of Chemistry journal article supplement (doi:10.1039/c3mt00125c), 2013-08-09
Supplement: c3mt00125c.pdf [file c3mt00125c.pdf]

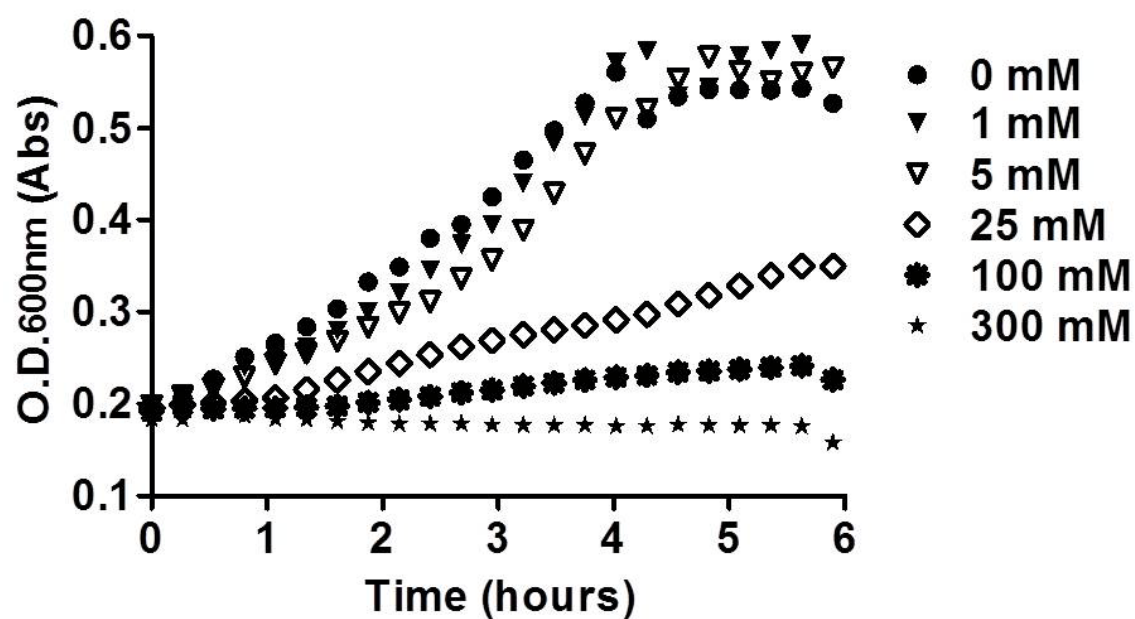

Supplementary Figure S1. Concentration-dependent inhibition of bacterial growth with *L*-captopril. *S. enterica* containing a plasmid expressing *DapE* (strain TN5935) was grown in *L.B.* medium in absence of *mDAP* supplementation, i.e. under selection for native *DapE* activity.
